# Supplementary material for: Reliability of Chest Wall Mobility and Its Correlation with Lung Functions in Healthy Nonsmokers, Healthy Smokers, and Patients with COPD
Source: Can Respir J. 2019 Feb 25;2019:5175949. doi: 10.1155/2019/5175949 (PMC6410441; doi:10.1155/2019/5175949)
Supplement: Supplementary Materials — The Supplementary Materials file is the SPSS data set used to support the findings of this study. [file 5175949.f1.xlsx]

## Sheet: Sheet1
GROUP	age	sex	occupation	height	weight	BMI_N	smoker	UPPERCH_E_1_Day1	UPPERCH_E_1_Day2	UPPERCH_E_2_Day1	UPPERCH_E_2_Day2	LowerCH_E_1_Day1	LowerCH_E_1_Day2	LowerCH_E_2_Day1	LowerCH_E_2_Day2	FVC	VC	IC	FEV1	FEV1FVC	Height_M	UPCH_E1_D1D2_diff	UPCH_E2_D1D2_diff	LOCH_E1_D1D2_diff	LOCH_E2_D1D2_diff	UPCH_E1_E2_D1_diff	UPCH_E1_E2_D2_diff	LOCH_E1_E2_D1_diff	LOCH_E1_E2_D2_diff	UPCH_E1_D1D2_mean	UPCH_E2_D1D2_mean	LOCH_E1_D1D2_mean	LOCH_E2_D1D2_mean	UPCH_E1E2_D1_mean	UPCH_E1E2_D2_mean	LOCH_E1E2_D1_mean	LOCH_E1E2_D2_mean
1	19	1	students	165	71	26.1	no	6.6	5.3	5.4	6.8	6.6	7	7.2	6.6	6	6	4	6	91	1.7	1.3	-1.4	-0.4	0.6	1.2	-1.5	-0.6	0.4	5.95	6.1	6.8	6.9	6	6.05	6.9	6.8
1	20	1	students	164	56	20.8	no	7.2	5.3	5.6	7.7	8.8	8.6	9	8.8	6	6	5	6	96	1.6	1.9	-2.1	0.2	0.2	1.6	-2.4	-0.2	-0.2	6.25	6.65	8.7	8.9	6.4	6.5	8.9	8.7
1	20	1	students	169	61	21.4	no	5.4	5.3	6	6.6	7	6	7	7	5	5	4	5	87	1.7	0.1	-0.6	1	0	-0.6	-1.3	0	-1	5.35	6.3	6.5	7	5.7	5.95	7	6.5
1	21	1	students	168	55	19.5	no	5.3	5.9	7.2	6.7	6.6	6	7	6.6	5	5	4	5	87	1.7	-0.6	0.5	0.6	0.4	-1.9	-0.8	-0.4	-0.6	5.6	6.95	6.3	6.8	6.25	6.3	6.8	6.3
1	21	1	student	165	63	23.1	no	2.1	2.2	3.5	4	2.5	2.6	2.6	2.5	3	2	4	3	75	1.7	-0.1	-0.5	-0.1	0.1	-1.4	-1.8	-0.1	0.1	2.15	3.75	2.55	2.55	2.8	3.1	2.55	2.55
1	23	1	student	181	85	25.9	no	4	6	6.3	4.8	8.8	7	6	8.8	4	4	5	5	90	1.8	-2	1.5	1.8	-2.8	-2.3	1.2	2.8	-1.8	5	5.55	7.9	7.4	5.15	5.4	7.4	7.9
1	22	1	student	180	68	21	no	5.3	5.9	7	7.5	7	8	8.3	7	5	5	3	5	91	1.8	-0.6	-0.5	-1	1.3	-1.7	-1.6	-1.3	1	5.6	7.25	7.5	7.65	6.15	6.7	7.65	7.5
1	21	1	student	172	82	27.7	no	5.6	5.3	6.9	7.3	7	8	8.1	7	6	6	6	5	94	1.7	0.3	-0.4	-1	1.1	-1.3	-2	-1.1	1	5.45	7.1	7.5	7.55	6.25	6.3	7.55	7.5
1	21	1	student	169	71	24.9	no	6	5.3	7.9	8	8.8	9	10.6	8.8	6	6	4	6	92	1.7	0.7	-0.1	-0.2	1.8	-1.9	-2.7	-1.8	0.2	5.65	7.95	8.9	9.7	6.95	6.65	9.7	8.9
1	21	1	student	178	74	23.4	no	6	4.8	9.9	8	7	8	8.2	7	6	6	7	6	92	1.8	1.2	1.9	-1	1.2	-3.9	-3.2	-1.2	1	5.4	8.95	7.5	7.6	7.95	6.4	7.6	7.5
1	21	1	student	170	74	25.6	no	2.1	3	2.4	2.8	2.5	5	3	2.5	3	3	5	6	83	1.7	-0.9	-0.4	-2.5	0.5	-0.3	0.2	-0.5	2.5	2.55	2.6	3.75	2.75	2.25	2.9	2.75	3.75
1	20	1	student	168	55	19.5	no	4.9	5.3	5.3	4.9	7	8	8.8	7	4	5	3	3	89	1.7	-0.4	0.4	-1	1.8	-0.4	0.4	-1.8	1	5.1	5.1	7.5	7.9	5.1	5.1	7.9	7.5
1	21	1	student	168	70	24.8	no	7.3	8	7.7	7.9	8.6	8.9	7	8.6	6	6	4	5	95	1.7	-0.7	-0.2	-0.3	-1.6	-0.4	0.1	1.6	0.3	7.65	7.8	8.75	7.8	7.5	7.95	7.8	8.75
1	21	1	student	158	85	34	no	8.8	8.5	8.9	9	7	6	8	7	6	6	4	6	99	1.6	0.3	-0.1	1	1	-0.1	-0.5	-1	-1	8.65	8.95	6.5	7.5	8.85	8.75	7.5	6.5
1	21	1	student	163	59	22.2	no	5.8	5.3	5.3	5.8	8.8	6	8	8.8	4	5	3	6	91	1.6	0.5	-0.5	2.8	-0.8	0.5	-0.5	0.8	-2.8	5.55	5.55	7.4	8.4	5.55	5.55	8.4	7.4
1	22	1	student	168	85	30.1	no	5.6	5.3	5.3	5.6	7	9	9	7	6	6	5	6	86	1.7	0.3	-0.3	-2	2	0.3	-0.3	-2	2	5.45	5.45	8	8	5.45	5.45	8	8
1	19	1	student	157	67	27.2	no	8.9	7.5	7.7	8.8	8.6	8.9	7	8.6	6	6	2	6	100	1.6	1.4	-1.1	-0.3	-1.6	1.2	-1.3	1.6	0.3	8.2	8.25	8.75	7.8	8.3	8.15	7.8	8.75
1	30	1	office work	178	78	24.6	no	8.8	9	8.4	8.6	11	10.8	10.8	11	6	6	4	6	99	1.8	-0.2	-0.2	0.2	-0.2	0.4	0.4	0.2	-0.2	8.9	8.5	10.9	10.9	8.6	8.8	10.9	10.9
1	32	1	office work	174	72	23.8	no	5.3	6	5.5	5.3	7	9	8	7	4	5	5	5	90	1.7	-0.7	0.2	-2	1	-0.2	0.7	-1	2	5.65	5.4	8	7.5	5.4	5.65	7.5	8
1	38	1	office work	156	74	30.4	no	2.1	3	2.4	2.3	2.5	5	4	2.5	3	3	4	3	88	1.6	-0.9	0.1	-2.5	1.5	-0.3	0.7	-1.5	2.5	2.55	2.35	3.75	3.25	2.25	2.65	3.25	3.75
1	25	1	student	185	60	17.5	no	3.8	4.8	5.6	6.8	7	5	6	6.9	3	4	4	4	80	1.9	-1	-1.2	2	-0.9	-1.8	-2	1	-1.9	4.3	6.2	6	6.45	4.7	5.8	6.5	5.95
1	22	1	student	184	72	21.3	no	6	5.6	5.8	7	7	9	6	7	6	6	5	5	93	1.8	0.4	-1.2	-2	-1	0.2	-1.4	1	2	5.8	6.4	8	6.5	5.9	6.3	6.5	8
1	32	1	student	170	57	19.7	no	6	5.6	5.8	6	7.2	9	6	7.2	6	6	6	4	93	1.7	0.4	-0.2	-1.8	-1.2	0.2	-0.4	1.2	1.8	5.8	5.9	8.1	6.6	5.9	5.8	6.6	8.1
1	22	1	student	167	69	24.7	no	6	6.6	5.6	6	8	5	7	8	6	6	6	5	92	1.7	-0.6	-0.4	3	-1	0.4	0.6	1	-3	6.3	5.8	6.5	7.5	5.8	6.3	7.5	6.5
1	36	1	office work	185	78	22.8	no	5.9	6	5.6	5.9	7.2	7.4	8	7.2	5	6	6	5	95	1.9	-0.1	-0.3	-0.2	0.8	0.3	0.1	-0.8	0.2	5.95	5.75	7.3	7.6	5.75	5.95	7.6	7.3
2	22	1	student	183	70	20.9	yes	5.4	7.7	5.6	5.4	8	5	9	8	5	6	6	5	91	1.8	-2.3	0.2	3	1	-0.2	2.3	-1	-3	6.55	5.5	6.5	8.5	5.5	6.55	8.5	6.5
2	21	1	student	170	60	20.8	yes	5.4	5.6	5.6	5.4	8	12	11	8	3	6	5	5	92	1.7	-0.2	0.2	-4	3	-0.2	0.2	-3	4	5.5	5.5	10	9.5	5.5	5.5	9.5	10
2	23	1	student	170	55	19	yes	5.4	5.6	5.6	5.4	8	9	9	8	5	5	5	5	83	1.7	-0.2	0.2	-1	1	-0.2	0.2	-1	1	5.5	5.5	8.5	8.5	5.5	5.5	8.5	8.5
2	24	1	student	165	52	19.1	yes	7.3	7.5	7.7	7.9	8.6	8.9	9	8.6	6	6	6	6	95	1.7	-0.2	-0.2	-0.3	0.4	-0.4	-0.4	-0.4	0.3	7.4	7.8	8.75	8.8	7.5	7.7	8.8	8.75
2	25	1	student	175	55	18	yes	5.4	5.6	5.6	5.4	8	6	9	8	5	5	5	5	90	1.8	-0.2	0.2	2	1	-0.2	0.2	-1	-2	5.5	5.5	7	8.5	5.5	5.5	8.5	7
2	24	1	student	181	69	21.1	yes	6	5.6	5.6	6	8	6	7	8	6	6	6	5	91	1.8	0.4	-0.4	2	-1	0.4	-0.4	1	-2	5.8	5.8	7	7.5	5.8	5.8	7.5	7
2	23	1	student	164	60	22.3	yes	5	5.6	5.6	5	8	7.4	6.7	8	5	5	5	3	87	1.6	-0.6	0.6	0.6	-1.3	-0.6	0.6	1.3	-0.6	5.3	5.3	7.7	7.35	5.3	5.3	7.35	7.7
2	23	1	student	160	90	35.2	yes	5	5.6	5.6	5	8.2	7.4	6.8	8.2	5	5	5	4	84	1.6	-0.6	0.6	0.8	-1.4	-0.6	0.6	1.4	-0.8	5.3	5.3	7.8	7.5	5.3	5.3	7.5	7.8
2	22	1	student	173	75	25.1	yes	6	5.6	5.6	6	8	7.4	6.9	8	5	5	6	4	92	1.7	0.4	-0.4	0.6	-1.1	0.4	-0.4	1.1	-0.6	5.8	5.8	7.7	7.45	5.8	5.8	7.45	7.7
2	20	1	student	169	69	24.2	yes	4.8	5.8	6.8	5	8	9.6	9.7	10.8	5	5	5	4	82	1.7	-1	1.8	-1.6	-1.1	-2	0.8	-1.7	-1.2	5.3	5.9	8.8	10.25	5.8	5.4	8.85	10.2
2	22	1	student	171	60	20.5	yes	5	5.6	5.6	5	8	7.4	7.3	8	5	5	5	4	83	1.7	-0.6	0.6	0.6	-0.7	-0.6	0.6	0.7	-0.6	5.3	5.3	7.7	7.65	5.3	5.3	7.65	7.7
2	21	1	student	171	83	28.4	yes	6	5.6	5.6	6	8	6	6.6	8	6	6	6	5	91	1.7	0.4	-0.4	2	-1.4	0.4	-0.4	1.4	-2	5.8	5.8	7	7.3	5.8	5.8	7.3	7
2	21	1	student	165	56	20.6	yes	4.8	5.8	6.8	5	8	9.6	9.7	10.8	5	4	4	3	83	1.7	-1	1.8	-1.6	-1.1	-2	0.8	-1.7	-1.2	5.3	5.9	8.8	10.25	5.8	5.4	8.85	10.2
2	20	1	student	174	93	30.7	yes	7.3	8	7.7	7.9	8.6	8.9	8.4	8.6	6	6	6	5	95	1.7	-0.7	-0.2	-0.3	-0.2	-0.4	0.1	0.2	0.3	7.65	7.8	8.75	8.5	7.5	7.95	8.5	8.75
2	19	1	student	166	49	17.8	yes	4.1	5	5	4.1	6	6	6.5	6	4	3	4	3	85	1.7	-0.9	0.9	0	0.5	-0.9	0.9	-0.5	0	4.55	4.55	6	6.25	4.55	4.55	6.25	6
2	22	1	student	179	72	22.5	yes	4.8	5.8	6.8	5	8	9.6	9.7	10.8	5	5	5	4	90	1.8	-1	1.8	-1.6	-1.1	-2	0.8	-1.7	-1.2	5.3	5.9	8.8	10.25	5.8	5.4	8.85	10.2
2	23	1	student	165	61	22.4	yes	4.1	5	5	4.1	6	6	5	6	5	3	4	4	83	1.7	-0.9	0.9	0	-1	-0.9	0.9	1	0	4.55	4.55	6	5.5	4.55	4.55	5.5	6
2	34	1	office work	159	84	33.2	yes	5	5.7	5.7	5	6	6	5	6	5	4	5	3	83	1.6	-0.7	0.7	0	-1	-0.7	0.7	1	0	5.35	5.35	6	5.5	5.35	5.35	5.5	6
2	23	1	student	173	57	19	yes	7.3	7.5	7.7	7.9	8.6	8.9	7	8.6	6	4	6	3	95	1.7	-0.2	-0.2	-0.3	-1.6	-0.4	-0.4	1.6	0.3	7.4	7.8	8.75	7.8	7.5	7.7	7.8	8.75
2	21	1	student	181	93	28.4	yes	5	5.2	5.2	5	6.8	7	6	6.8	5	6	5	5	87	1.8	-0.2	0.2	-0.2	-0.8	-0.2	0.2	0.8	0.2	5.1	5.1	6.9	6.4	5.1	5.1	6.4	6.9
2	22	1	student	163	55	20.7	yes	6	5.2	5.2	6	8	7	7	8	6	4	6	4	92	1.6	0.8	-0.8	1	-1	0.8	-0.8	1	-1	5.6	5.6	7.5	7.5	5.6	5.6	7.5	7.5
2	30	1	office work	159	79	31.2	yes	5	5.8	5.8	5	8	7	7	8	4	4	5	3	86	1.6	-0.8	0.8	1	-1	-0.8	0.8	1	-1	5.4	5.4	7.5	7.5	5.4	5.4	7.5	7.5
2	34	1	office work	173	86	28.7	yes	5	6.7	6.7	5	8	7	7	8	5	5	5	4	84	1.7	-1.7	1.7	1	-1	-1.7	1.7	1	-1	5.85	5.85	7.5	7.5	5.85	5.85	7.5	7.5
2	26	1	office work	157	53	21.5	yes	5	5.6	5.6	5	8	7	7	8	8	5	5	7	89	1.6	-0.6	0.6	1	-1	-0.6	0.6	1	-1	5.3	5.3	7.5	7.5	5.3	5.3	7.5	7.5
2	25	1	student	187	90	25.7	yes	5.8	5	5	5.8	6.8	7	7	6.8	5	4	6	4	87	1.9	0.8	-0.8	-0.2	0.2	0.8	-0.8	-0.2	0.2	5.4	5.4	6.9	6.9	5.4	5.4	6.9	6.9
3	26	1	student	155	50	20.8	copd	4.2	4.6	4.6	4.2	5	5	7.1	6.7	4	4	4	4	69	1.6	-0.4	0.4	0	0.4	-0.4	0.4	-2.1	-1.7	4.4	4.4	5	6.9	4.4	4.4	6.05	5.85
3	70	1	retired	165	103	37.8	copd	3.3	4.6	4.6	3.3	5	4	6	5.5	3	5	3	2	75	1.7	-1.3	1.3	1	0.5	-1.3	1.3	-1	-1.5	3.95	3.95	4.5	5.75	3.95	3.95	5.5	4.75
3	57	1	farmer	157	67	27.2	copd	4	4	4	4	5.9	5	6	5.9	3	3	4	3	71	1.6	0	0	0.9	0.1	0	0	-0.1	-0.9	4	4	5.45	5.95	4	4	5.95	5.45
3	44	1	farmer	157	56	22.7	copd	4	5	4	4	5.3	4	5	5.3	2	2	4	1	78	1.6	-1	0	1.3	-0.3	0	1	0.3	-1.3	4.5	4	4.65	5.15	4	4.5	5.15	4.65
3	60	1	retired	172	117	39.5	copd	3	5	4	3	5.8	4	7	6.8	3	4	3	2	74	1.7	-2	1	1.8	0.2	-1	2	-1.2	-2.8	4	3.5	4.9	6.9	3.5	4	6.4	5.4
3	56	1	farmer	172	92	31.1	copd	3	5	4	3	4	5	7.2	6.8	4	5	3	3	78	1.7	-2	1	-1	0.4	-1	2	-3.2	-1.8	4	3.5	4.5	7	3.5	4	5.6	5.9
3	55	1	retired	160	66	25.8	copd	4	4	4	4	4.8	4	6.6	7.2	3	3	4	2	76	1.6	0	0	0.8	-0.6	0	0	-1.8	-3.2	4	4	4.4	6.9	4	4	5.7	5.6
3	32	1	office work	178	78	24.6	copd	3	4	4	3	5	4	6.8	7	3	3	3	2	67	1.8	-1	1	1	-0.2	-1	1	-1.8	-3	3.5	3.5	4.5	6.9	3.5	3.5	5.9	5.5
3	70	1	no work	161	89	34.3	copd	4	4	4	4	5	4.6	8	9	3	2	4	2	77	1.6	0	0	0.4	-1	0	0	-3	-4.4	4	4	4.8	8.5	4	4	6.5	6.8
3	50	1	office work	160	58	22.7	copd	4.9	5.2	5.2	4.9	4	4.7	6	6.6	2	2	4	1	85	1.6	-0.3	0.3	-0.7	-0.6	-0.3	0.3	-2	-1.9	5.05	5.05	4.35	6.3	5.05	5.05	5	5.65
3	60	1	farmer	170	117	40.5	copd	3.2	4	5.6	6	5	5.5	7	7.7	3	3	3	3	71	1.7	-0.8	-0.4	-0.5	-0.7	-2.4	-2	-2	-2.2	3.6	5.8	5.25	7.35	4.4	5	6	6.6
3	58	1	retired	165	70	25.7	copd	4	4	5.9	6	5	5.4	6	6.6	3	3	4	3	63	1.7	0	-0.1	-0.4	-0.6	-1.9	-2	-1	-1.2	4	5.95	5.2	6.3	4.95	5	5.5	6
3	44	1	retired	155	97	40.4	copd	4.6	4.8	4.8	4.6	4	5.4	7	6.7	2	2	5	2	74	1.6	-0.2	0.2	-1.4	0.3	-0.2	0.2	-3	-1.3	4.7	4.7	4.7	6.85	4.7	4.7	5.5	6.05
3	55	1	office work	160	65	25.4	copd	4.8	5.8	6.8	7	8	9.6	11	10.8	2	3	5	3	74	1.6	-1	-0.2	-1.6	0.2	-2	-1.2	-3	-1.2	5.3	6.9	8.8	10.9	5.8	6.4	9.5	10.2
3	44	1	teacher	165	94	34.5	copd	4	4	7	8	5	4	4	5	4	3	4	3	68	1.7	0	-1	1	-1	-3	-4	1	-1	4	7.5	4.5	4.5	5.5	6	4.5	4.5
3	60	1	retired	162	92	35.1	copd	4	4	6	7	5	5	5	5	3	3	4	3	68	1.6	0	-1	0	0	-2	-3	0	0	4	6.5	5	5	5	5.5	5	5
3	70	1	no work	165	70	25.7	copd	1.8	1.6	1.8	2	2.1	2.2	2.2	2.1	3	2	2	2	68	1.7	0.2	-0.2	-0.1	0.1	0	-0.4	-0.1	0.1	1.7	1.9	2.15	2.15	1.8	1.8	2.15	2.15
3	65	1	retired	170	75	26	copd	4	4.6	4.6	4	4	4.5	4.5	4	3	2	4	2	77	1.7	-0.6	0.6	-0.5	0.5	-0.6	0.6	-0.5	0.5	4.3	4.3	4.25	4.25	4.3	4.3	4.25	4.25
3	40	1	office work	160	50	19.5	copd	4.8	5.8	4	4.4	8	9.6	9.7	10.8	3	3	5	3	85	1.6	-1	-0.4	-1.6	-1.1	0.8	1.4	-1.7	-1.2	5.3	4.2	8.8	10.25	4.4	5.1	8.85	10.2
3	25	1	office work	174	95	31.4	copd	1.8	1.6	1.8	2	2.1	2.2	2.2	2.1	5	5	2	4	73	1.7	0.2	-0.2	-0.1	0.1	0	-0.4	-0.1	0.1	1.7	1.9	2.15	2.15	1.8	1.8	2.15	2.15
